# Supplementary material
Source: PubMed Central journal article supplement (PMC5633509)
Supplement: NIHMS900113-supplement-Supplemental_Table_1_revised.pdf [file NIHMS900113-supplement-Supplemental_Table_1_revised.pdf]

**Supplemental Table 1: Baseline characteristics of tesamorelin-treated subjects with ALT or AST > 30 U/L by VAT responder status at week 26**

| Variable                     | VAT responders<br>(n = 177) | VAT nonresponders<br>(n = 80) | P-value      |
|------------------------------|-----------------------------|-------------------------------|--------------|
| <b>Demographic</b>           |                             |                               |              |
| Age (y)                      | 47.6 ± 7.0                  | 47.6 ± 7.1                    | 0.94         |
| Male %                       | 94                          | 93                            | 0.58         |
| Race %                       |                             |                               | 0.43         |
| White                        | 85                          | 79                            |              |
| Black                        | 7                           | 11                            |              |
| Asian                        | 0                           | 1                             |              |
| Hispanic                     | 6                           | 8                             |              |
| Other                        | 2                           | 1                             |              |
| Hepatitis C %                | 6                           | 19                            | <b>0.002</b> |
| Any viral hepatitis %        | 21                          | 38                            | <b>0.009</b> |
| Testosterone %               | 27                          | 29                            | 0.76         |
| Lipid-lowering therapy %     | 53                          | 48                            | 0.42         |
| <b>Immunologic</b>           |                             |                               |              |
| CD4 (cells/mm <sup>3</sup> ) | 632 ± 318                   | 624 ± 294                     | 0.85         |
| Undetectable viral load %    | 76                          | 73                            | 0.34         |
| ART %                        |                             |                               | 0.35         |
| NRTI alone                   | 5                           | 6                             |              |
| NRTI + NNRTI                 | 39                          | 48                            |              |
| NRTI + PI                    | 41                          | 29                            |              |
| NRTI + NNRTI + PI            | 11                          | 10                            |              |
| Other                        | 5                           | 8                             |              |
| <b>Metabolic</b>             |                             |                               |              |
| BMI (kg/m <sup>2</sup> )     | 28.7 ± 3.6                  | 29.6 ± 4.6                    | 0.09         |
| VAT (cm <sup>2</sup> )       | 190 ± 83                    | 202 ± 77                      | 0.27         |
| SAT (cm <sup>2</sup> )       | 202 ± 108                   | 221 ± 122                     | 0.23         |
| Fat in limbs (kg)            | 6.1 ± 3.5                   | 7.2 ± 4.4                     | <b>0.03</b>  |
| Lean body mass (kg)          | 64.4 ± 8.7                  | 65.5 ± 10.9                   | 0.37         |
| ALT (U/L)                    | 50 ± 20                     | 53 ± 23                       | 0.31         |
| AST (U/L)                    | 37 ± 13                     | 39 ± 15                       | 0.46         |
| IGF-1 (ng/mL)                | 151 ± 59                    | 158 ± 68                      | 0.46         |

Mean ± SD

VAT, visceral adipose tissue; ART, antiretroviral therapy; NRTI, nucleoside reverse transcriptase inhibitor; NNRTI, non-nucleoside reverse transcriptase inhibitor; PI, protease inhibitor; BMI, body mass index; SAT, subcutaneous adipose tissue; ALT, alanine aminotransferase; AST, aspartate aminotransferase; IGF-1, insulin-like growth factor 1.
