# Supplementary material
Source: PubMed Central journal article supplement (PMC5633509)
Supplement: NIHMS900113-supplement-Supplemental_Table_2_revised.pdf [file NIHMS900113-supplement-Supplemental_Table_2_revised.pdf]

**Supplemental Table 2: Changes among tesamorelin-treated subjects with baseline ALT or AST > 30 U/L by VAT responder status at week 26**

**A) Changes in ALT, AST, and VAT**

|                        | Baseline               |                          |                 | $\Delta$ (Week 26 – Week 0) |                          |                           |
|------------------------|------------------------|--------------------------|-----------------|-----------------------------|--------------------------|---------------------------|
|                        | Responder<br>(n = 177) | Nonresponder<br>(n = 80) | <i>P</i> -value | Responder<br>(n = 176)      | Nonresponder<br>(n = 79) | <i>P</i> -value           |
| ALT (U/L)              | 50.0 ± 20.3            | 52.9 ± 23.2              | 0.31            | -8.9 ± 22.6                 | 1.4 ± 34.7               | <b>0.004</b> <sup>1</sup> |
| AST (U/L)              | 37.4 ± 12.9            | 38.8 ± 15.0              | 0.46            | -3.8 ± 12.9                 | 0.4 ± 22.4               | <b>0.04</b> <sup>1</sup>  |
| VAT (cm <sup>2</sup> ) | 190 ± 83               | 202 ± 77                 | 0.27            | -51 ± 34                    | 16 ± 27                  | N/A                       |

**B) Frequency of resolution of abnormal liver enzymes (ALT or AST ≤ 30 U/L at week 26)**

|           | Responder<br>(n = 176) | Nonresponder<br>(n = 79) | <i>P</i> -value | Odds Ratio<br>(95% CI)             |
|-----------|------------------------|--------------------------|-----------------|------------------------------------|
| ALT (U/L) | 35%                    | 18%                      | <b>0.007</b>    | <b>2.5 (1.2, 5.3)</b> <sup>2</sup> |
| AST (U/L) | 52%                    | 41%                      | 0.10            | 1.5 (0.8, 2.8) <sup>2</sup>        |

Mean ± SD

ALT, alanine aminotransferase; AST, aspartate aminotransferase; VAT, visceral adipose tissue.

<sup>1</sup>*P*-value for responder status is based on the following model:  $\Delta$  ALT or AST = baseline ALT or AST + responder status + clinical trial + viral hepatitis status

<sup>2</sup>Odds Ratio for responder vs. nonresponder is based on the following model: ALT or AST ≤ 30 U/L = baseline ALT or AST + responder status + clinical trial + viral hepatitis status
